# Supplementary material
Source: Springer Nature journal article supplement (https://www.springermedizin.de/resource/supplementary/12891_2013_2434_MOESM3_ESM.pdf/9509344)

# % Achieving CDC PA Guideline Stratified by Number of Painful Joints and EQ5D Score

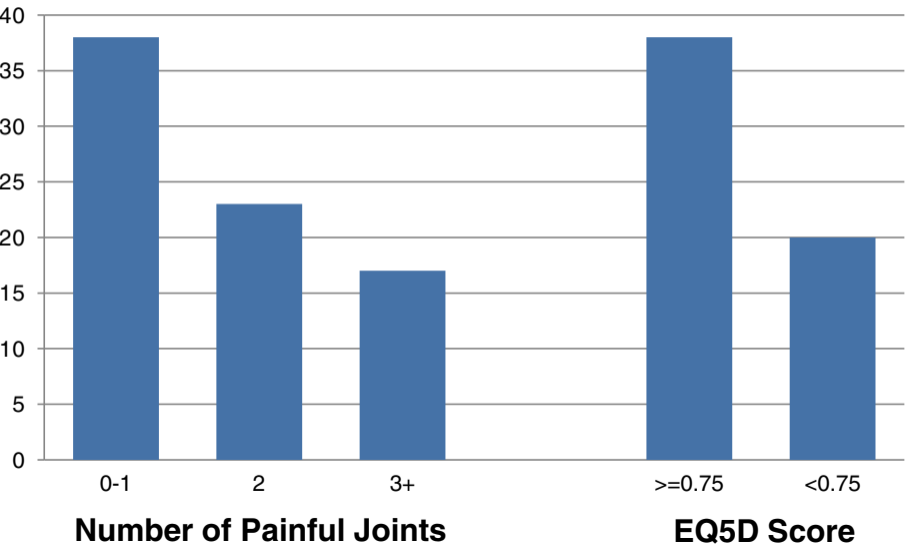

Supplement: MOESM3 [file 9509344]
